# Supplementary material
Source: publisher site journal article supplement (https://www.spandidos-publications.com/8157/downloadSupplementary)
Supplement: Supplementary file 1 [file downloadSupplementary]

Table SI. P-values for comparison of N<sup>6</sup>-methyladenosine-related enzyme expression in sequencing data from the GSE115313 dataset between diabetes mellitus and non-diabetes mellitus groups.

| Genes     | P-values |
|-----------|----------|
| HNRNPA2B1 | 0.28045  |
| HNRNPC    | 0.76416  |
| IGF2BP1   | 0.90054  |
| IGF2BP2   | 0.00025  |
| IGF2BP3   | 0.51114  |
| METTL14   | 0.94023  |
| RBM15     | 0.14401  |
| RBM15B    | 0.48326  |
| VIRMA     | 0.82199  |
| WTAP      | 0.78331  |
| YTHDC2    | 0.74515  |
| ZC3H13    | 0.06851  |

HNRNPA2B1, heterogeneous nuclear ribonucleoproteins A2/B1; HNRNPC, heterogeneous nuclear ribonucleoproteins C1/C2; IGF2BP1, insulin-like growth factor 2 mRNA-binding protein 1; IGF2BP2, insulin-like growth factor 2 mRNA binding protein 2; IGF2BP3, insulin-like growth factor 2 mRNA-binding protein 3; METTL14, methyltransferase-like protein 14; RBM15, RNA-binding protein 15; RBM15B, putative RNA-binding protein 15B; VIRMA, protein virilizer homolog; WTAP, pre-mRNA-splicing regulator WTAP; YTHDC2, 3'-5' RNA helicase YTHDC2; ZC3H13, zinc finger CCCH domain-containing protein 13.

Table SII. Correlation and predicted interactions of the candidate genes with IGF2BP2.

| Gene     | R                    | P-value                | Predicted interaction with IGF2BP2 |
|----------|----------------------|------------------------|------------------------------------|
| ACOT8    | 0.570                | 0.000                  | Positive                           |
| AKR1B10  | 0.710                | 0.000                  | Negative                           |
| ANG      | 0.560                | 0.000                  | Negative                           |
| CALML4   | 0.830                | 0.000                  | Positive                           |
| CDH1     | 0.80                 | 0.000                  | Positive                           |
| CES2     | 0.800                | 0.000                  | Positive                           |
| COA6     | 0.220                | 2.3x10 <sup>-5</sup>   | Positive                           |
| COX6B1   | 0.490                | 0.000                  | Positive                           |
| DHRS11   | 0.830                | 0.000                  | Negative                           |
| DPEP1    | 0.067                | 0.210                  | Negative                           |
| ECM1     | -0.330               | 1.5x10 <sup>-10</sup>  | Positive                           |
| EFEMP1   | -0.260               | 7.6x10 <sup>-7</sup>   | Positive                           |
| EIF1AY   | -0.220               | 5.0x10 <sup>-5</sup>   | Negative                           |
| EPS15    | -0.510               | 4.6x10 <sup>-24</sup>  | Positive                           |
| EPS8L2   | 0.830                | 0.000                  | Positive                           |
| FDX1     | 0.620                | 0.000                  | Positive                           |
| FGB      | -0.110               | 0.033                  | Negative                           |
| GGT5     | -0.220               | 3.1x10 <sup>-5</sup>   | Negative                           |
| GLS      | -0.250               | 2.3x10 <sup>-6</sup>   | Positive                           |
| HBB      | -0.057               | 0.290                  | Negative                           |
| HGS      | 6.4x10 <sup>-5</sup> | 1.000                  | Positive                           |
| HLA-DRB1 | 0.180                | 0.001                  | Negative                           |
| HSD17B8  | 0.630                | 0.000                  | Negative                           |
| HSPB7    | -0.490               | 3.2x10 <sup>-22</sup>  | Positive                           |
| IGFBP7   | -0.590               | 1.2x10 <sup>-33</sup>  | Positive                           |
| IGHV3-48 | 0.410                | 2.7x10 <sup>-15</sup>  | Negative                           |
| MDK      | 0.410                | 8.9x10 <sup>-16</sup>  | Positive                           |
| MMAB     | 0.290                | 4.6x10 <sup>-8</sup>   | Positive                           |
| MRPL18   | -0.240               | 4.0x10 <sup>-6</sup>   | Positive                           |
| MRPL51   | -0.350               | 9.1x10 <sup>-12</sup>  | Positive                           |
| MRPL53   | -0.390               | 7.7x10 <sup>-14</sup>  | Negative                           |
| MT-CO2   | 0.410                | 8.9x10 <sup>-16</sup>  | Negative                           |
| MUC13    | 0.750                | 0.000                  | Negative                           |
| MVB12A   | 0.340                | 8.0x10 <sup>-11</sup>  | Positive                           |
| MYO1A    | 0.800                | 0.000                  | Negative                           |
| NDUFA8   | -0.450               | 8.3x10 <sup>-19</sup>  | Positive                           |
| NDUFAF8  | /                    | /                      | Negative                           |
| PADI4    | -0.120               | 0.026                  | Negative                           |
| PBLD     | 0.770                | 0.000                  | Positive                           |
| PDLIM2   | -0.650               | 1.6x10 <sup>-42</sup>  | Positive                           |
| PKIG     | -0.560               | 8.5x10 <sup>-30</sup>  | Positive                           |
| PUS1     | 0.100                | 0.063                  | Positive                           |
| RNASE3   | 0.180                | 0.001                  | Negative                           |
| SCIN     | 0.730                | 0.000                  | Negative                           |
| SCO1     | 0.610                | 0.000                  | Positive                           |
| SDCBP2   | 0.800                | 0.000                  | Negative                           |
| TESC     | -0.150               | 0.005                  | Positive                           |
| TIMM8A   | 0.380                | 3.5x10 <sup>-13</sup>  | Negative                           |
| TIMM8B   | 0.076                | 0.160                  | Positive                           |
| TRAPPC6B | -0.590               | 8.3x10 <sup>-348</sup> | Positive                           |
| UBA52    | -0.380               | 2.6x10 <sup>-13</sup>  | Positive                           |

IGF2BP2, insulin-like growth factor 2 mRNA binding protein 2; ACOT8, acyl-CoA thioesterase 8; AKR1B10, aldo-keto reductase family 1 member B10; ANG, angiogenin; CALML4, calmodulin like 4; CDH1, cadherin 1; CES2, carboxylesterase 2; COA6, cytochrome c oxidase assembly factor 6; COX6B1, cytochrome c oxidase subunit 6B1; DHRS11, dehydrogenase/reductase 11; DPEP1, dipeptidase 1; ECM1, extracellular matrix protein 1; EFEMP1, EGF containing fibulin extracellular matrix protein 1; EIF1AY, eukaryotic translation initiation factor 1A Y-linked; EPS15, epidermal

growth factor receptor pathway substrate 15; EPS8L2, EPS8 like 2; FDX1, ferredoxin 1; FGB, fibrinogen beta chain; GGT5, gamma-glutamyltransferase 5; GLS, glutaminase; HBB, hemoglobin subunit beta; HGS, hepatocyte growth factor-regulated tyrosine kinase substrate; HLA-DRB1, major histocompatibility complex, class II, DR beta 1; HSD17B8, hydroxysteroid 17-beta dehydrogenase 8 ; HSPB7, heat shock protein family B (small) member 7; IGFBP7, insulin like growth factor binding protein 7; IGHV3-48, immunoglobulin heavy variable 3-48; MDK, midkine; MMAB, metabolism of cobalamin associated B; MRPL18, mitochondrial ribosomal protein L18; MRPL51, mitochondrial ribosomal protein L51; MRPL53, mitochondrial ribosomal protein L53; MT-CO2, mitochondrially encoded cytochrome c oxidase II; MUC13, mucin 13; MVB12A, multivesicular body subunit 12A; MYO1A, myosin IA; NDUFA8, NADH:ubiquinone oxidoreductase subunit A8; NDUF8, NADH:ubiquinone oxidoreductase complex assembly factor 8; PADI4, peptidyl arginine deiminase 4; PBLD, phenazine biosynthesis like protein domain containing protein; PDLIM2, PDZ and LIM domain 2; PKIG, cAMP-dependent protein kinase inhibitor gamma; PUS1, pseudouridine synthase 1; RNASE3, ribonuclease A family member 3; SCIN, scinderin; SCO1, synthesis of cytochrome c oxidase 1; SDCBP2, syndecan binding protein 2; TESC, tescalcin; TIMM8A, translocase of inner mitochondrial membrane 8A; TIMM8B, translocase of inner mitochondrial membrane 8B; TRAPPC6B, trafficking protein particle complex subunit 6B; UBA52, ubiquitin A-52 residue ribosomal protein fusion product 1.

Table SIII. Details of the Venn diagram.

| Section                                  | Genes                                                                                                                                                                                                         |
|------------------------------------------|---------------------------------------------------------------------------------------------------------------------------------------------------------------------------------------------------------------|
| Genes positively correlated with IGF2BP2 | ACOT8, AKR1B10, ANG, CALML4, CDH1, CES2, COA6, COX6B1, DHRS11, EPS8L2, FDX1, HLA-DRB1, HSD17B8, IGHV3-48, MDK, MMAB, MT-CO2, MUC13, MVB12A, MYO1A, PBLD, RNASE3, SCIN, SCO1, SDCBP2, TIMM8A, TIMM8B           |
| Genes predicted to interact with IGF2BP2 | ACOT8, CALML4, CDH1, CES2, COA6, COX6B1, ECM1, EFEMP1, EPS15, EPS8L2, FDX1, GLS, HGS, HSPB7, IGFBP7, MDK, MMAB, MRPL18, MRPL51, MVB12A, NDUFA8, PBLD, PDLIM2, PKIG, PUS1, SCO1, TESC, TIMM8B, TRAPPC6B, UBA52 |
| Overlapping genes                        | ACOT8, CALML4, CDH1, CES2, COA6, COX6B1, EPS8L2, FDX1, MDK, MMAB, MVB12A, PBLD, SCO1, TIMM8B                                                                                                                  |

IGF2BP2, insulin-like growth factor 2 mRNA binding protein 2; ACOT8, acyl-CoA thioesterase 8; AKR1B10, aldo-keto reductase family 1 member B10; ANG, angiogenin; CALML4, calmodulin like 4; CDH1, cadherin 1; CES2, carboxylesterase 2; COA6, cytochrome c oxidase assembly factor 6; COX6B1, cytochrome c oxidase subunit 6B1; DHRS11, dehydrogenase/reductase 11; EPS8L2, epidermal growth factor receptor pathway substrate 8; FDX1, ferredoxin 1; HLA-DRB1, major histocompatibility complex, class II, DR Beta 1; HSD17B8, hydroxysteroid 17-beta dehydrogenase 8; IGHV3-48, immunoglobulin heavy variable 3-48; MDK, midkine; MMAB, metabolism of cobalamin associated B; MT-CO2, mitochondrially encoded cytochrome c oxidase II; MUC13, mucin 13; MVB12A, multivesicular body subunit 12A; MYO1A, myosin IA; PBLD, phenazine biosynthesis like protein domain containing protein; RNASE3, ribonuclease A family member 3; SCIN, scinderin; SCO1, synthesis of cytochrome c oxidase 1; SDCBP2, syndecan binding protein 2; TIMM8A, translocase of inner mitochondrial membrane 8A; TIMM8B, translocase of inner mitochondrial membrane 8B; ECM1, extracellular matrix protein 1; EFEMP1, EGF containing fibulin extracellular matrix protein 1; EPS15, epidermal growth factor receptor pathway substrate 15; GLS, glutaminase; HGS, hepatocyte growth factor-regulated tyrosine kinase substrate; HSPB7, heat shock protein family B (small) member 7; IGFBP7, insulin like growth factor binding protein 7; MRPL18, mitochondrial ribosomal protein L18; MRPL51, mitochondrial ribosomal protein L51; NDUFA8, NADH:ubiquinone oxidoreductase subunit A8; PDLIM2, PDZ and LIM domain 2; PKIG, cAMP-dependent protein kinase inhibitor gamma; PUS1, pseudouridine synthase 1; TESC, tescalcin; TRAPPC6B, trafficking protein particle complex subunit 6B; UBA52, ubiquitin a-52 residue ribosomal protein fusion product 1.
